# Supplementary material
Source: PubMed Central journal article supplement (PMC3985692)
Supplement: bi401699u_si_001.pdf [file bi401699u_si_001.pdf]

## Supporting Information

# Non-Enzymatic Synthesis of the P-Cluster in the Nitrogenase MoFe Protein: Evidence for the Involvement of All-ferrous $[\text{Fe}_4\text{S}_4]^0$ Intermediates

Kresimir Rupnik<sup>†</sup>, Chi Chung Lee<sup>§</sup>, Yilin Hu<sup>§</sup>, Markus W. Ribbe<sup>§,\*</sup> and Brian J. Hales<sup>†,\*</sup>

<sup>†</sup>Department of Chemistry, Louisiana State University, Baton Rouge, LA 70808

<sup>§</sup>Department of Molecular Biology and Biochemistry, University of California, Irvine, CA  
92697

A

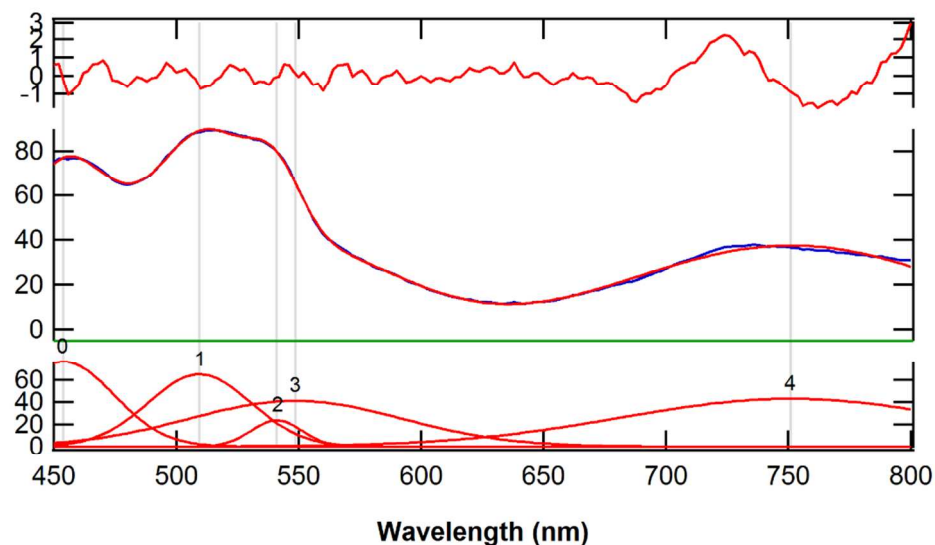

B

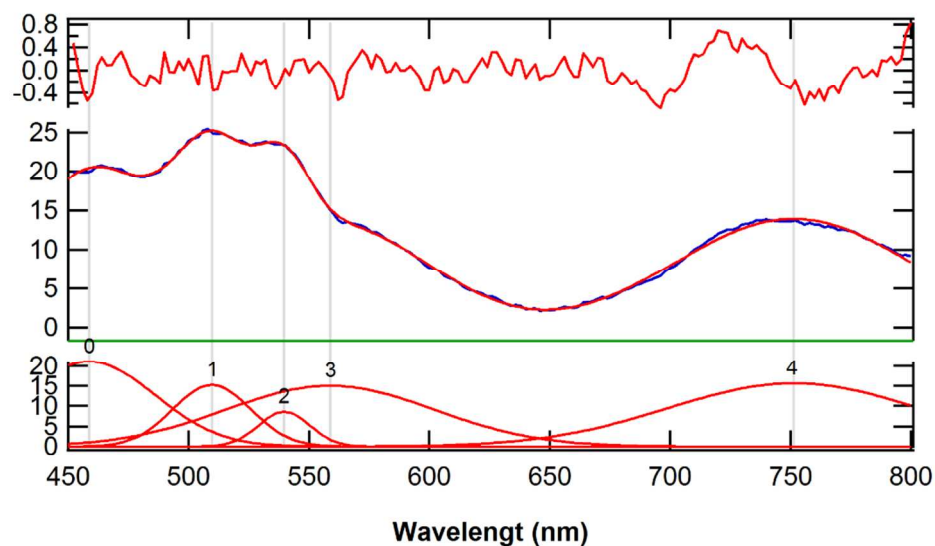

**Figure S1.** Gaussian Simulations of the MCD Spectra of Ti(III) Citrate Reduced  $\Delta nifH$  NifDK (A) and NifH (B) at 1.6K and 6T. Top Curves in each figure: Intensity difference between simulation and spectrum. Middle Curves: Simulated (Red) and experimental (Blue) spectra. Bottom Curves: Gaussian simulations of the various individual transitions. The first simulation is the initial reference point and is labeled 0 with subsequent simulations labeled 1, 2, etc.

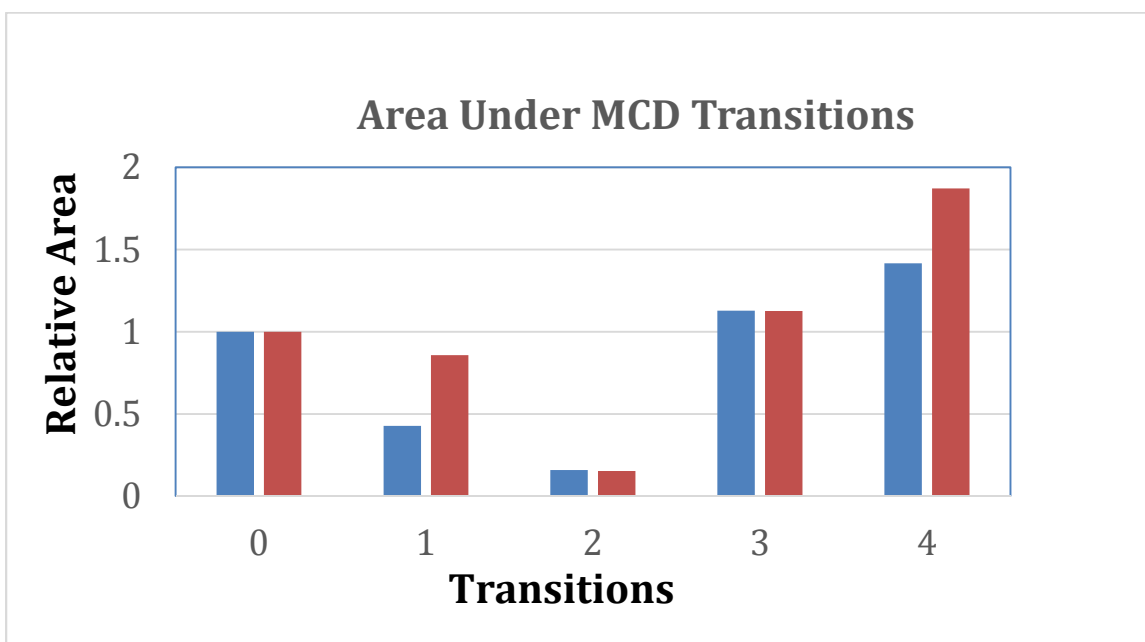

**Table T1.** Comparison of MCD Spectral Peaks and Areas of Gaussian Fits to Ti(III) Citrate Reduced NifH (Blue) and  $\Delta nifH$  NifDK (Red). Plot of the integrated area under each of the five simulated major MCD spectral transitions (see S1) relative to the area of transitions 0 (normalized to 1). The five transitions for the reduced NifH are 0: 459 nm, 1: 510 nm, 2: 540 nm, 3: 559 nm and 4: 751 nm. The five transitions for the reduced  $\Delta nifH$  NifDK are 0: 454 nm, 1: 510 nm, 2: 541 nm, 3: 549 nm and 4: 751 nm.

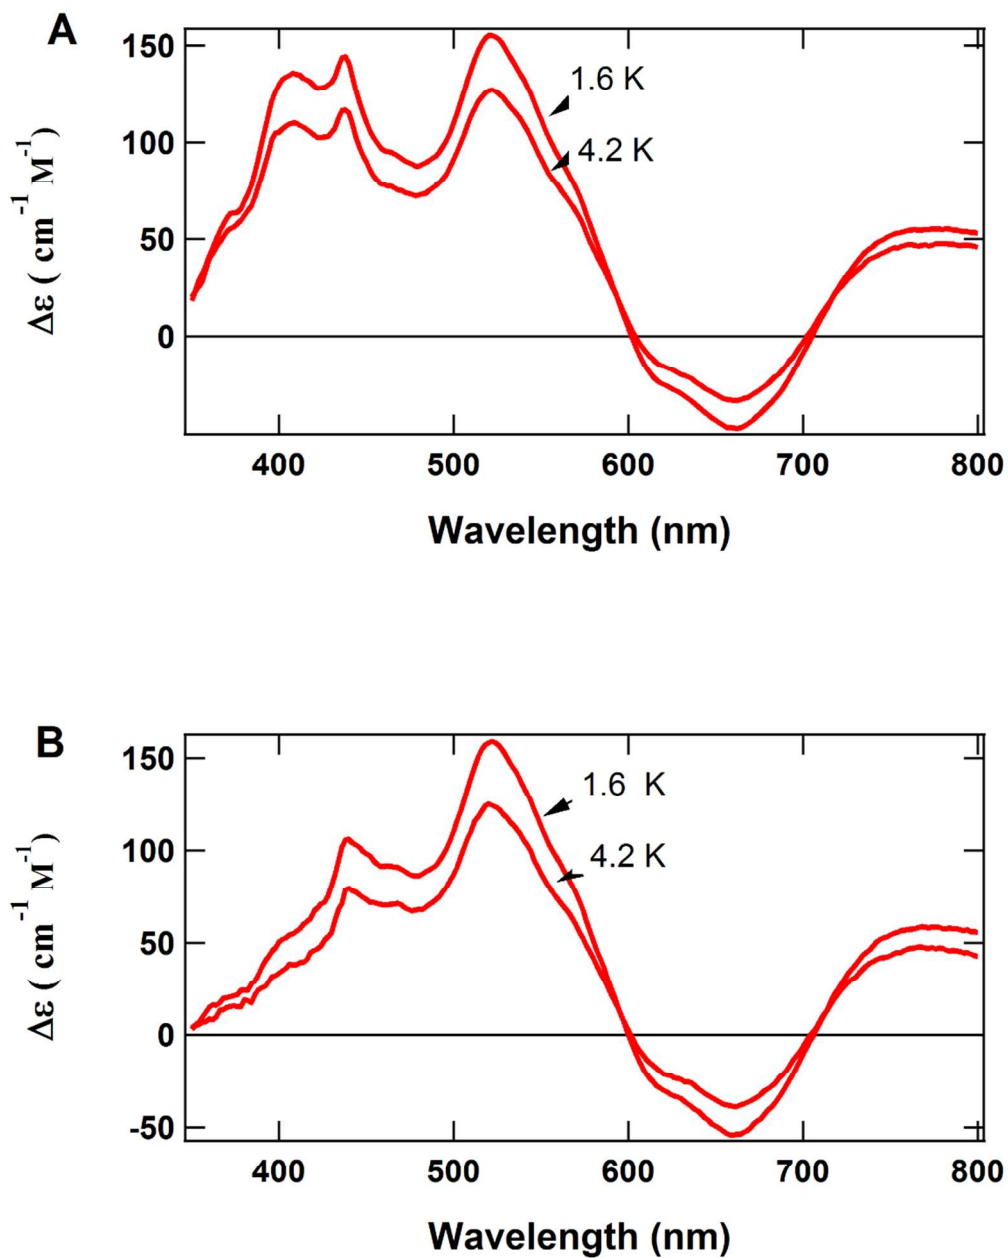

**Figure S2.** MCD Spectra of  $\Delta nifH$  NifDK (A) in DTN Following Ti(III) Citrate Reduction and Subsequent IDS Oxidation and (B) Direct Equilibration in DTN Following Ti(III) Citrate Reduction Recorded at 1.6 K and 4.2 K. The uniform decrease in intensity with increased temperature is consistent with both spectra corresponding to only a single paramagnetic species. Note that both spectra have the same intensity, which represents about 30-35% that of the as-isolated protein.

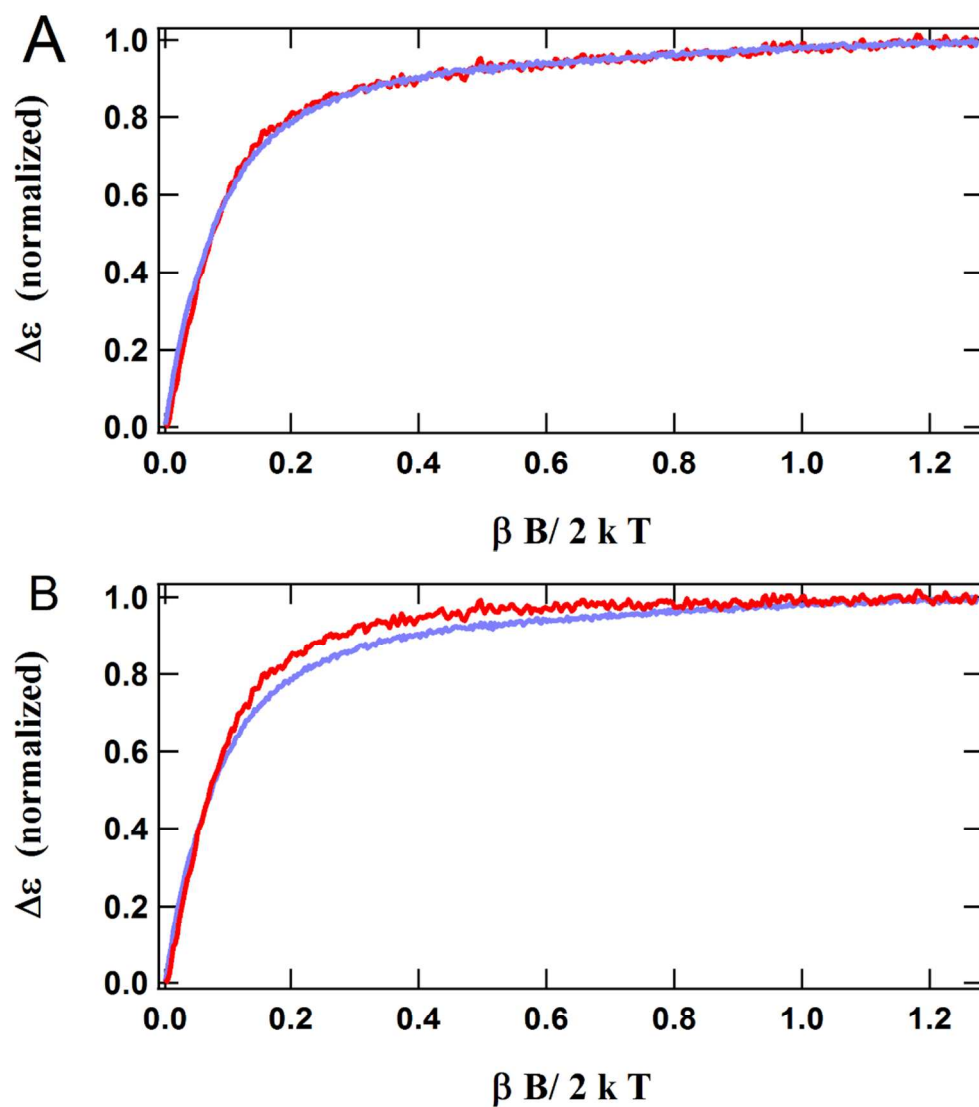

**Figure S3.** Simulation (Blue) of the Magnetization Curve of OAR at 1.6 K and 790 nm using  $S = 1$  (A) and  $S = 2$  (B) for X compared to the known (Red) magnetization curve for  $P^{2+}$ . The magnetization curve of X at 1.6 K was approximated by assuming that the composite experimental curve (i.e., X +  $P^{2+}$ ) at 790 nm is due to 75%  $P^{2+}$  and 25% X, as deduced from the spectral simulation (see text). Because X is EPR silent in the IDS oxidized state, it is assumed to be an integer state as is  $P^{2+}$ . The parameters used for the best-fit simulations are (A)  $D = -4.9 \text{ cm}^{-1}$ ,  $E/D = 0.296$  using Polarizations  $M_{xy} = 0.5$ ,  $M_{xz} = 0.8$  and  $M_{yz} = 1.0$  and (B)  $D = -5.05 \text{ cm}^{-1}$ ,  $E/D = 0.151$  using Polarizations  $M_{xy} = 1.1$ ,  $M_{xz} = 0.8$  and  $M_{yz} = 0.9$ .
